# Supplementary material
Source: PubMed Central journal article supplement (PMC9578417)
Supplement: aac.02091-21-s0001.pdf [file aac.02091-21-s0001.pdf]

1 **Supplementary information**

2 **Table S1** List of strains

| Strain                                                      | Genotype                                                                                                                                                                                                                                           | Source       |
|-------------------------------------------------------------|----------------------------------------------------------------------------------------------------------------------------------------------------------------------------------------------------------------------------------------------------|--------------|
| <i>E. coli</i> DH5α                                         | Cloning strain (the genotype: F <sup>-</sup> Φ80 <i>lacZ</i> ΔM15 Δ( <i>lacZ</i> YA- <i>argF</i> ) U169 <i>recA1 endA1 hsdR17</i> (r <sub>k</sub> <sup>-</sup> , m <sub>k</sub> <sup>+</sup> ) <i>phoA supE44 thi-1 gyrA96 relA1 λ<sup>-</sup></i> | Invitrogen   |
| <i>E. coli</i> BL21(DE3)pLysS                               | Protein expression strain<br>F-ompT hsdSB (rB-, mB-) galdcmrne131 (DE3) carrying pLysS (Cam <sup>r</sup> )                                                                                                                                         | Invitrogen   |
| <i>M. smegmatis</i> mc <sup>2</sup> 155                     | <i>ept-1</i> ; high-frequency transformation mutant of <i>M. smegmatis</i> ATCC607                                                                                                                                                                 | (1)          |
| <i>M. tuberculosis</i> mc <sup>2</sup> 6230                 | Δ <i>RD1</i> Δ <i>panCD</i>                                                                                                                                                                                                                        | (2)          |
| <i>M. smegmatis</i> Δ <i>rnhA</i>                           | Derivative of mc <sup>2</sup> 155 carrying inactivated allele of <i>rnhA</i> ( <i>MSMEG_5562</i> ) marked with Kan <sup>r</sup>                                                                                                                    | This study . |
| <i>M. smegmatis</i> Δ <i>rnhC</i>                           | Derivative of mc <sup>2</sup> 155 carrying inactivated allele of <i>rnhC</i> ( <i>MSMEG_4305</i> ) marked with Hyg <sup>r</sup>                                                                                                                    | This study   |
| <i>M. smegmatis</i> Δ <i>rnhA</i> <i>prnhA</i>              | <i>Ms</i> Δ <i>rnhA</i> complemented with <i>prnhA</i> ; Kan <sup>r</sup> , Hyg <sup>r</sup>                                                                                                                                                       | This study   |
| <i>M. smegmatis</i> Δ <i>rnhC</i> <i>prnhC</i>              | <i>Ms</i> Δ <i>rnhC</i> complemented with <i>pRv2228c</i>                                                                                                                                                                                          | This study   |
| <i>M. smegmatis</i> Δ <i>rnhC</i> pMV306G13+ LuxABCDE       | <i>Ms</i> Δ <i>rnhC</i> containing pMV306G13+ LuxABCDE chromosomally integrated; Kan <sup>r</sup>                                                                                                                                                  | This study   |
| <i>M. smegmatis</i> mc <sup>2</sup> 155 pMV306G13+ LuxABCDE | <i>M. smegmatis</i> mc <sup>2</sup> 155 containing pMV306G13+ LuxABCDE chromosomally integrated; Kan <sup>r</sup>                                                                                                                                  | This study   |

4 **Table S2** List of plasmids

|                        | Characteristic                                                                                                                                                                                     | Reference  |
|------------------------|----------------------------------------------------------------------------------------------------------------------------------------------------------------------------------------------------|------------|
| pMAL-C2                | Expression vector with IPTG inducible expression of the maltose binding protein as affinity tag and Factor Xa cleavage site upstream of the multiple cloning site; Amp <sup>r</sup>                | NEB        |
| pAAZ-Rv2228c           | pMAL-C2 plasmid modified by replacement of factor Xa site by His6-tag and 3C protease cleavage site; Rv2228c cloned in-frame for expression.                                                       | This study |
| pMV306G13+<br>LuxABCDE | Mycobacterial integrating vector containing the <i>luxABCDE</i> operon from <i>Photobacterium luminescens</i> , Kan <sup>r</sup>                                                                   | (3)        |
| pOLYG                  | pAL5000-based multicopy <i>E. coli</i> – <i>Mycobacterium</i> shuttle vector; Hyg <sup>r</sup>                                                                                                     | (4)        |
| pEJ414                 | Integrating plasmid containing promoterless <i>lacZ</i> gene, Km <sup>r</sup>                                                                                                                      | (5)        |
| pBBK                   | p32ΔL with promoter and start codon of <i>M. tuberculosis fbpA</i> cloned as a 241 bp <i>Xba</i> I– <i>Bam</i> HI fragment with <i>kmr</i> gene replacing <i>hyg</i> to give Kanamycin resistance. | (6)        |
| <i>prnhA</i>           | pOLYG containing <i>rnhA</i> with 350 bp promoter region cloned as a <i>Bgl</i> II/ <i>Hind</i> III fragment.                                                                                      | This study |
| p32GoriM               | p32ΔL- <i>nuc</i> with 0.8 kb <i>aacC1</i> gene replacing <i>hyg</i> to give gentamicin resistance.                                                                                                | This study |
| pRv2228c               | Rv2228c cloned in-frame as a <i>Bam</i> HI/ <i>Eco</i> R1 fragment to the p32ΔL promoter in p32GoriM                                                                                               | This study |
| pAAZ- <i>TopA</i>      | pEJ414 containing 530bp upstream and 30bp coding sequence of <i>MSMEI_6157</i> fused in frame to <i>lacZ</i>                                                                                       | This study |
| pAAZ- <i>GyrBA</i>     | pEJ414 containing 231bp upstream and 1000bp coding sequence of <i>MSMEI_0007</i> fused in frame to <i>lacZ</i>                                                                                     | This study |

5

6

7 **Table S3.** List of HIV RNase HI inhibitors and their activity against *M. tuberculosis* RNase HI at  
8 100  $\mu$ M (Active: compounds that show a reduction in the activity *M. tuberculosis* RNase HI at  
9 100  $\mu$ M. Inactive: compounds that show no reduction in the activity of *M. tuberculosis* at  
10 100  $\mu$ M.)

| <b>compound</b> | <b>Activity against <i>M. tuberculosis</i> RNase HI</b> |
|-----------------|---------------------------------------------------------|
| NSC353720       | Active                                                  |
| NSC600285       | Active                                                  |
| NSC600286       | Active                                                  |
| NSC353681       | Active                                                  |
| NSC14543        | Inactive                                                |
| NSC20410        | Inactive                                                |
| NSC143101       | Active                                                  |
| NSC35676        | Inactive                                                |
| NSC45382        | Inactive                                                |
| NSC56351        | Inactive                                                |
| NSC73300        | Inactive                                                |
| NSC18806        | Active                                                  |
| NSC112200       | Inactive                                                |
| NSC130796       | Inactive                                                |
| NSC133457       | Inactive                                                |
| NSC228148       | Inactive                                                |
| NSC605657       | Inactive                                                |
| NSC610984       | Inactive                                                |
| NSC99726        | Active                                                  |
| NSC80693        | Active                                                  |
| NSC668394       | Inactive                                                |
| NSC31892        | Inactive                                                |
| NSC727447       | Inactive                                                |
| NSC51535        | Active                                                  |
| NSC117949       | Active                                                  |
| NSC128437       | Inactive                                                |

|           |          |
|-----------|----------|
| NSC204474 | Inactive |
| NSC203867 | Inactive |
| NSC99722  | Inactive |
| NSC657715 | Inactive |
| NSC613575 | Inactive |
| NSC205497 | Inactive |
| NSC99727  | Inactive |

11

12

```

pKanR  421  GATCGTGGTCTACGAGGCCACACTCAGTGC GCGCCAGTCGGCCATCTCGCGGAAGGGCGC 480
          |||
pHIGH  2924 GATCGTGGTCTACGAGGCCACACTCAGTGC GCGCCAGTCGGCCATCTCGCGGAAGGG--- 2980

pKanR  481  AGCAGCGCGCACGGCGGCGAGCACAGTTGC GCGGCGCGCAAAGTCCGCGTCAGCCATGGA 540
          |||
pHIGH  2981  AGCAGCGCGCACGGCGGCGAGCACAGTTGC GCGGCGCGCAAAGTCCGCGTCAGCCATGGA 3040

pKanR  541  GGCATTGCTATG-----AGCGACGGCTACAGCGACGGCTACAACCGGCAGCCG 588
          |||
pHIGH  3041  GGCATTGCTATGAGCGACGGCTACAGCGACGGCTACAGCGACGGCTACAACCGGCAGCCG 3100
          repB: M S D G Y S D G Y S D G Y N R Q P

```

13

14 **FIG S1** Nucleotide sequence of the C-terminus of *repA* of pHIGH101 (pHIGH) showing position of the 3 bp  
15 deletion reported by Bourn et al which confers 8-fold higher copy number, compared to the 12 bp deletion  
16 detected in this study in *repB* on the kanamycin-resistant vector backbone (pKanR). The stop codon of *repA*  
17 overlaps with the start codon of *repB*. Arrows indicate three identical direct repeats that could favour a  
18 polymerase slippage mechanism of deletion. The amino acid sequence of RepB is indicated next to the coding  
19 sequence in each case.

20

21

22

23 **References**

- 24 1. Snapper SB, Melton RE, Mustafa S, Kieser T, Jacobs WR, Jr. 1990. Isolation and  
25 characterization of efficient plasmid transformation mutants of *Mycobacterium*  
26 *smegmatis*. Mol. Microbiol **4**:1911-9.
- 27 2. Sambandamurthy VK, Derrick SC, Hsu T, Chen B, Larsen MH, Jalapathy KV, Chen M,  
28 Kim J, Porcelli SA, Chan J, Morris SL, Jacobs WR, Jr. 2006. *Mycobacterium tuberculosis*  
29  $\Delta$ RD1  $\Delta$ panCD: a safe and limited replicating mutant strain that protects  
30 immunocompetent and immunocompromised mice against experimental  
31 tuberculosis. Vaccine **24**:6309-20.
- 32 3. Andreu N, Zelmer A, Fletcher T, Elkington PT, Ward TH, Ripoll J, Parish T, Bancroft GJ,  
33 Schaible U, Robertson BD, Wiles S. 2010. Optimisation of bioluminescent reporters for  
34 use with mycobacteria. PLoS One 5:e10777.
- 35 4. Ó Gaora P, Barnini S, Hayward C, Filley E, Rook G, Young D, Thole J. 1997. Mycobacteria  
36 as Immunogens: Development of Expression Vectors for Use in Multiple  
37 Mycobacterial Species. Med. Princ. Pract. **6**:91-96.
- 38 5. Papavinasundaram KG, Anderson C, Brooks PC, Thomas NA, Movahedzadeh F,  
39 Jenner PJ, Colston MJ, Davis EO. 2001. Slow induction of RecA by DNA damage in  
40 *Mycobacterium tuberculosis*. Microbiology **147**:3271-3279.
- 41 6. Downing KJ, McAdam RA, Mizrahi V. 1999. *Staphylococcus aureus* nuclease is a useful  
42 secretion reporter for mycobacteria. Gene **239**:293-9.

43

44
